# Supplementary material for: Experimental and theoretical investigation of synthesis and properties of dodecanethiol-functionalized MoS2
Source: Royal Society of Chemistry journal article supplement (doi:10.1039/d3cp02631k), 2023-01-01
Supplement: d3cp02631k1.pdf [file d3cp02631k1.pdf]

# Experimental and Theoretical Investigation of Synthesis and Properties of Dodecanethiol- functionalized MoS<sub>2</sub>

Tuna A. Duran<sup>1</sup>, Denis Šabani<sup>2</sup>, Milorad V. Milošević<sup>2</sup>, Hasan Sahin<sup>3\*</sup>

*<sup>1</sup>Department of Chemistry, Izmir Institute of Technology, 35430,  
Izmir, Turkey*

*<sup>2</sup>Department of Physics, University of Antwerp,  
Groenenborgerlaan 171, B-2020, Antwerp, Belgium*

*<sup>3</sup>Department of Photonics, Izmir Institute of Technology, 35430,  
Izmir, Turkey*

**August 21, 2023**

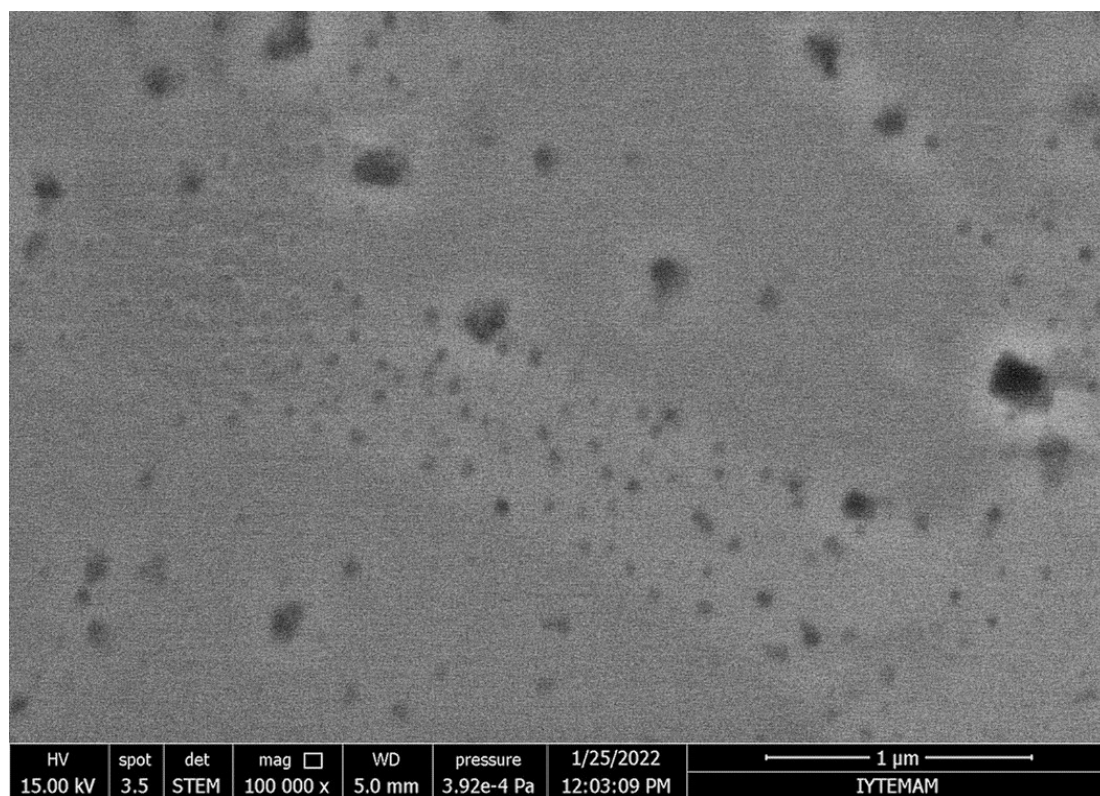

Figure S1: STEM image of bare sonicated NMP (GQDs).

\* To whom correspondence should be addressed.

email: hasansahin@iyte.edu.tr
